# Supplementary material for: Cofunctioning of bacterial exometabolites drives root microbiota establishment
Source: PubMed Central journal article supplement — Proc Natl Acad Sci U S A. 2023 Apr 5;120(15):e2221508120. doi: 10.1073/pnas.2221508120 (PMC10104540; doi:10.1073/pnas.2221508120), 2023-04-05
Supplement: pnas.2221508120.sapp.pdf [file pnas.2221508120.sapp.pdf]

## Supporting Information for

### Co-functioning of bacterial exometabolites drives root microbiota establishment

Felix Getzke<sup>1,12</sup>, M. Amine Hassani<sup>1,9,12</sup>, Max Crüsemann<sup>2</sup>, Milena Malisic<sup>1,3</sup>, Pengfan Zhang<sup>1</sup>, Yuji Ishigaki<sup>4</sup>, Nils Böhringer<sup>5,6</sup>, Alicia Jiménez Fernández<sup>1</sup>, Lei Wang<sup>5</sup>, Jana Ordon<sup>1</sup>, Ka-Wai Ma<sup>1</sup>, Thorsten Thiergart<sup>1</sup>, Christopher J. Harbort<sup>1,10</sup>, Hidde Wesseler<sup>1</sup>, Shingo Miyauchi<sup>1,3,11</sup>, Ruben Garrido-Oter<sup>1,3</sup>, Ken Shirasu<sup>4,7</sup>, Till F. Schäberle<sup>5,6,8</sup>, Stéphane Hacquard<sup>1,3,\*</sup>, Paul Schulze-Lefert<sup>1,3,\*</sup>

Stéphane Hacquard; Paul Schulze-Lefert

Email: [hacquard@mpipz.mpg.de](mailto:hacquard@mpipz.mpg.de); [schlef@mpipz.mpg.de](mailto:schlef@mpipz.mpg.de)

#### This PDF file includes:

Figures S1 to S6

List of Tables S1 to S5

Material, data, and code availability

Detailed Material and Methods

References

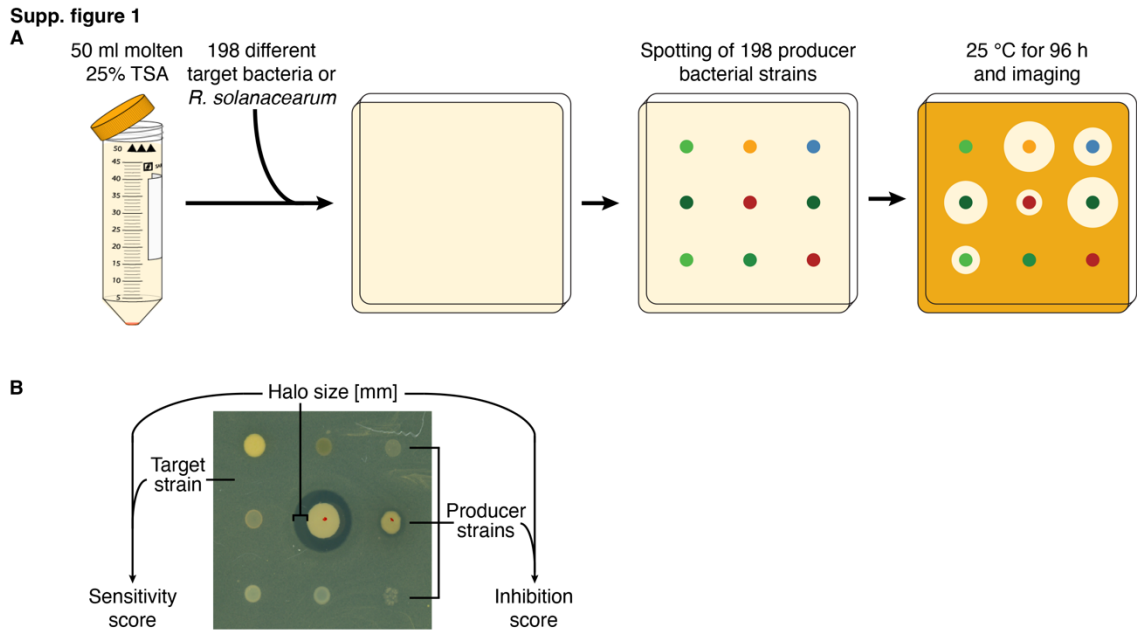

34

35 **Figure S1 Flowchart and output example of the modified Burkholder assay (mBA)**  
 36 **screen**

37 (A) Schematic illustration of the screen for interbacterial interactions in a mBA. First,  
 38 100  $\mu$ l of a bacterial solution from one strain are re-suspended in 50 ml of cooled, but  
 39 molten 25% tryptic soy agar (25% TSA) and poured into a petri dish. Then, 24 bacterial  
 40 strains are spotted on top of the solidified medium. The plates are incubated for 96 h at  
 41 25 °C. Pictures are taken and the size of the halo of inhibition is measured.

42 (B) An example agar plate depicting a halo of inhibition produced by a producer strain on  
 43 the bacterial lawn of a target strain, grown in 25% TSA. Explanation of nomenclature used  
 44 in Fig. 1.

45

Supp. figure 2

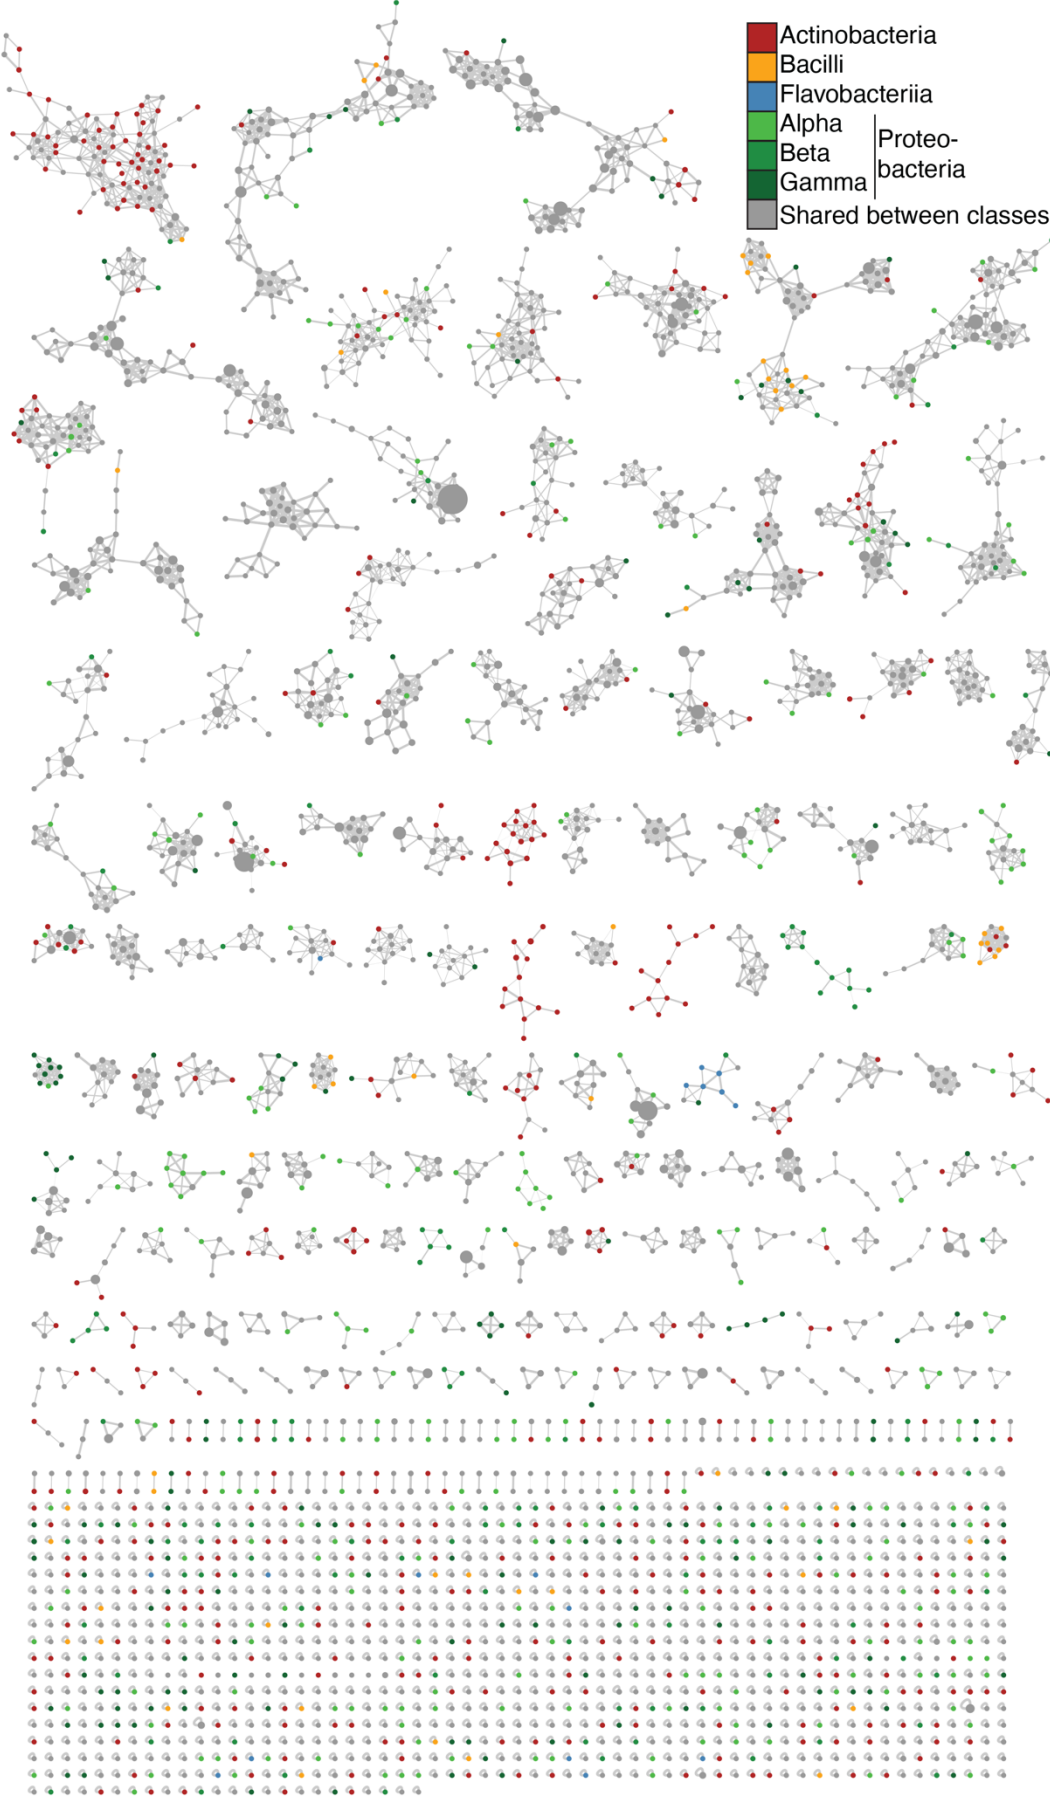

47 **Figure S2 Identification of class-specific exometabolites**

48 The metabolomes of all 198 individual strains were assessed using liquid chromatography  
49 tandem mass spectrometry (UPLC-MS/MS). Molecular networking of bacterial  
50 metabolites obtained from organic extracts of the 198 strains, grown separately on 25%  
51 TSA for 96 h (Methods), was determined based on the Global Natural Products Social  
52 (GNPS) molecular networking workflow. The network consists of 3,314 nodes and 247  
53 clusters (*i.e.*, molecular families) with at least two nodes and 1,046 singletons. Node sizes  
54 correspond to number of obtained spectra. Shared metabolites between at least two strains  
55 belonging to different classes are coloured in grey. Metabolites that are unique to one class  
56 are coloured according to the respective class colour code.

57

Supp. figure 3

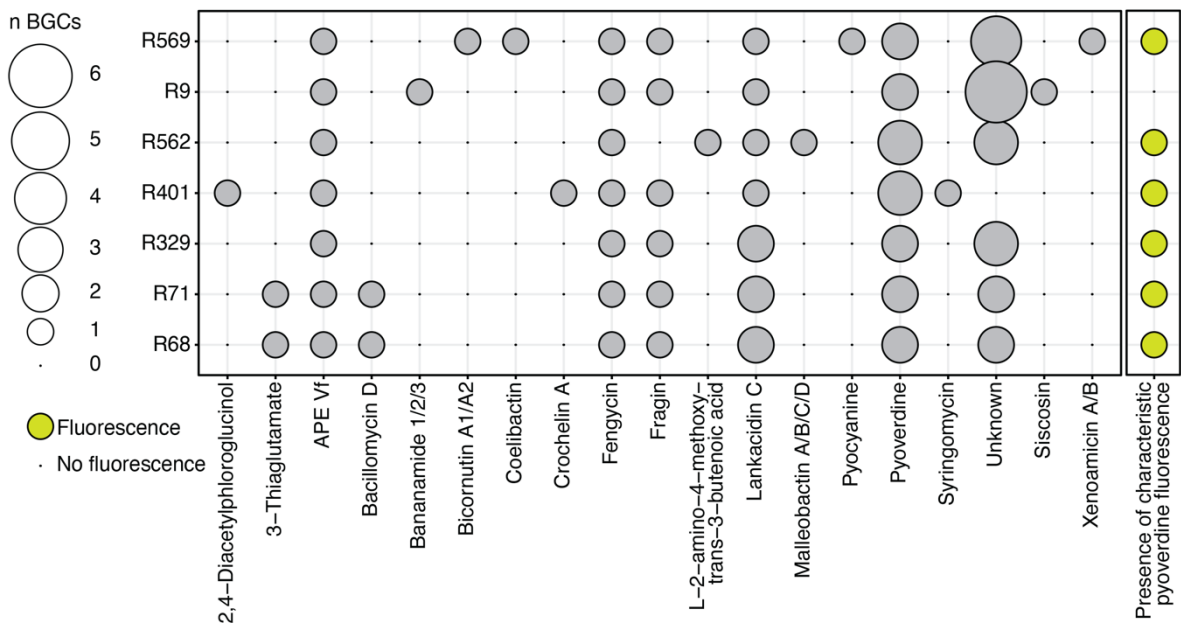

58

59 **Figure S3 Genetic potential for the biosynthesis of specialized metabolites by all tested**  
 60 ***Pseudomonas spp.* Strains**

61 Using antiSMASH, we predicted BGCs for all genomes of the herein-included bacteria.  
 62 All predicted BGCs within the seven tested *Pseudomonas spp.* strains are depicted in grey  
 63 and are named according to the putatively produced metabolite. In light green, the presence  
 64 or absence of pyoverdine-specific fluorescence, which is indicative of pyoverdine  
 65 production, is highlighted.

66

Supp. figure 4

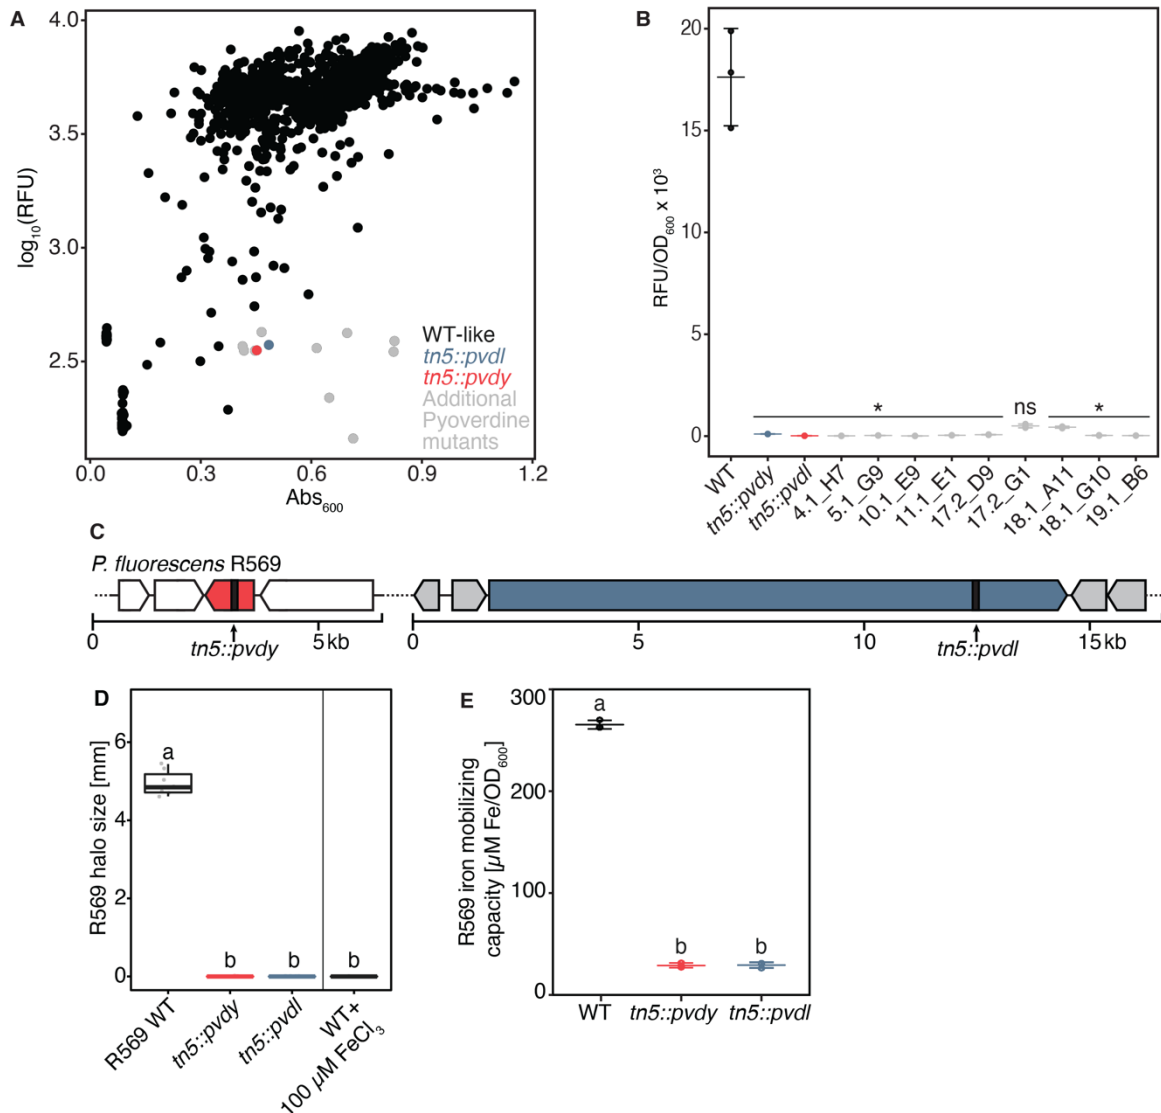

67

68 **Figure S4 Pyoverdine produced by *Pseudomonas fluorescens* R569 acts as a sole**  
 69 **inhibitory exometabolite**

70 (A) Initial screen for the lack of pyoverdine-specific fluorescence of approx. 2,000 R569  
 71 mutants with single random mini-Tn5 integration sites in the genome. Using a plate reader,  
 72 pyoverdine-specific fluorescence (excitation at 395 nm and emission at 470 nm) and  $\text{OD}_{600}$   
 73 of individual R569 mutants were quantified. Twelve mutants with WT-like growth ( $> -1x$   
 74 MAD) and reduced pyoverdine-specific fluorescence ( $< -6x$  MAD) are highlighted in blue,  
 75 red or light grey.

76 (B) Eleven out of the previously identified twelve putative pyoverdine mutants were  
77 independently confirmed for their lack of pyoverdine-specific fluorescence normalized to  
78 the mutants Abs<sub>600</sub>. Statistical significance was determined by Kruskal-Wallis followed by  
79 Fisher's LSD post-hoc test and Benjamini-Hochberg adjustment. Significance compared  
80 to WT is indicated by black asterisks (\* indicate  $p < 0.05$ ; n=3).

81 (C) Schematic overview of the genomic context of the fragmented *pvd*-operon which  
82 encodes a fraction of all pyoverdine biosynthetic genes of *P. fluorescens* R569. Genes  
83 within the BGC are coloured in grey, *pvdY* and *pvdL* are highlighted in red and blue,  
84 respectively. Transposon integration sites are highlighted by vertical black bars.

85 (D) Halo production of R569 WT and two transposon-insertion mutants that are impaired  
86 in the production of pyoverdine (*tn5::pvdY*, *tn5::pvdL*). Mutant names and colours are  
87 depicted as in panel C. *Rs* was used as a target strain. Halo size measurements were taken  
88 after three days of interaction. Letters indicate statistically significant differences as  
89 determined by Kruskal-Wallis followed by Dunn's post-hoc test and Benjamini-Hochberg  
90 adjustment with  $p < 0.05$  (n=9).

91 (E) Ferric iron mobilizing activity of R569 WT and mutants that are impaired in the  
92 production of pyoverdine. Letters indicate statistically significant differences as  
93 determined by Kruskal-Wallis followed by Dunn's post-hoc test and Benjamini-Hochberg  
94 adjustment with  $p < 0.05$  (n=3).

95

96

Supp. figure 5

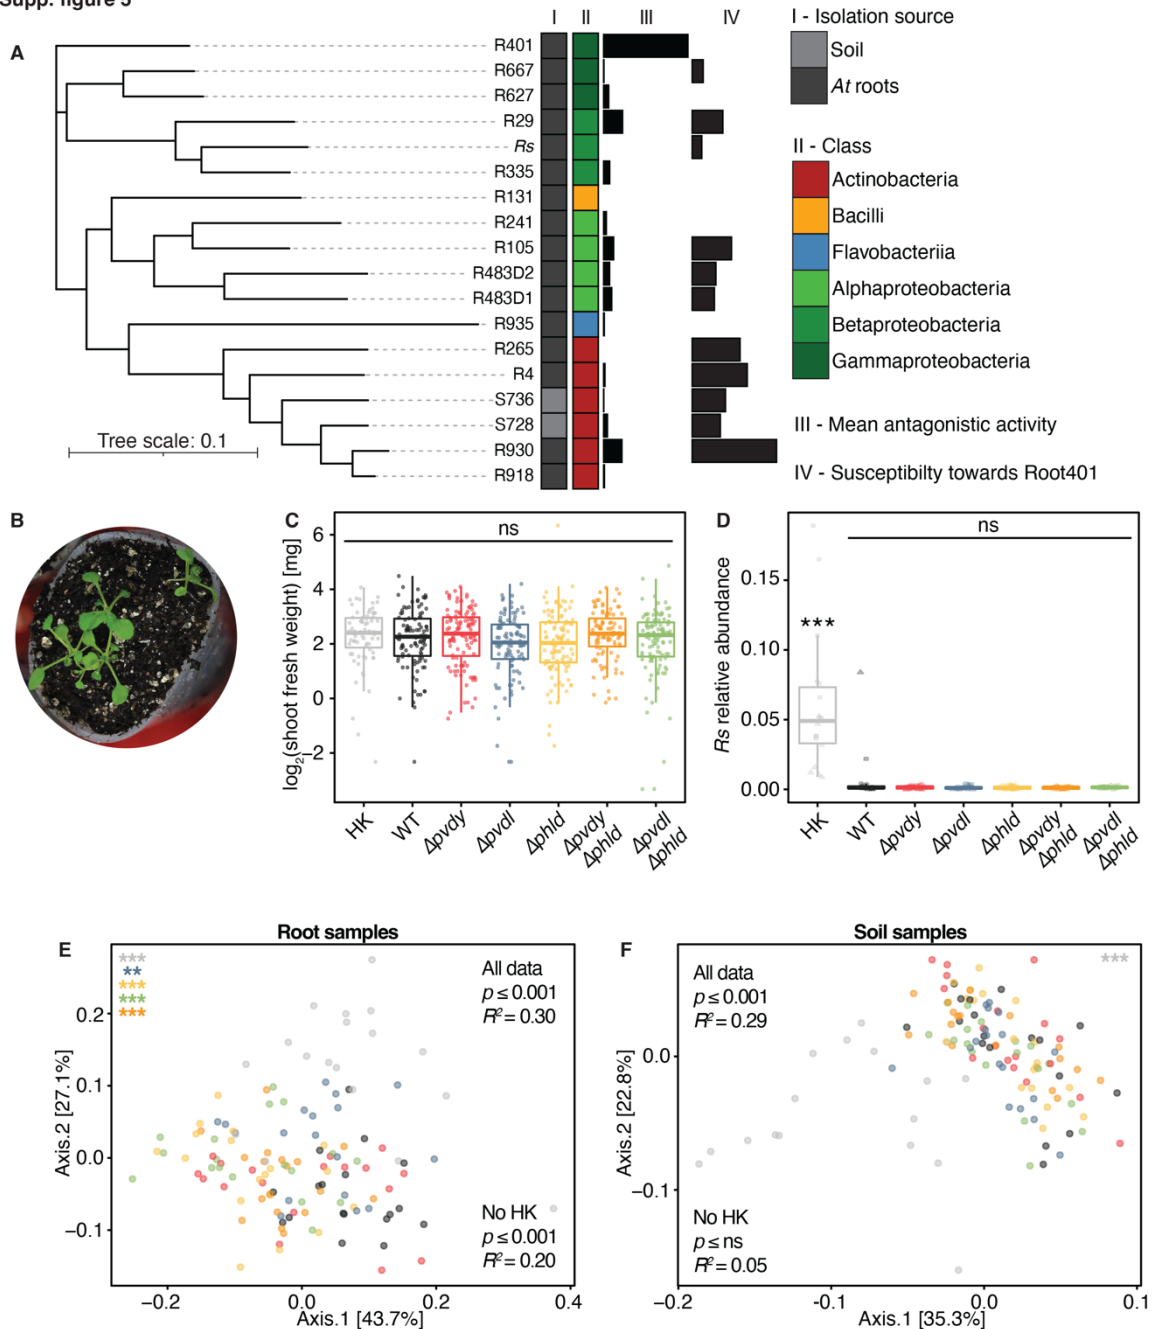

97

98 **Figure S5 *R. solanacearum* does not cause disease symptoms in the tested conditions**

99 (A) Phylogenetic tree of SynCom members based on v5v7 16S rRNA genes. The tree  
 100 depicts the mean inhibitory activity (III) shown in Figure 1 as well as the mean sensitivity  
 101 to R401 WT (IV) also derived from Figure 1. For more precise taxonomic assignments of  
 102 SynCom members please see **Table S1**.

103 (B) Exemplary image of a Flowpot with HK treatment at 21 dpi.



104 (C) log<sub>2</sub>-transformed shoot fresh weight of *A. thaliana* plants grown in the gnotobiotic  
105 Flowpot system for 21 dpi. No statistical difference (ns) could be determined by Kruskal-  
106 Wallis followed by Dunn's post-hoc test and Benjamini-Hochberg adjustment (n=18).  
107 (D) Relative abundance of *R. solanacearum* on the *A. thaliana* roots at 21 dpi. Statistical  
108 significance was determined by Kruskal-Wallis followed by Dunn's post-hoc test and  
109 Benjamini-Hochberg adjustment. Significance compared to WT is indicated by black  
110 asterisks (\*\*\*) indicates  $p < 0.001$ ; ns, not significant; n=18).  
111 (E–F) Unconstrained PCoA of bacterial beta diversity (Bray-Curtis dissimilarity) of root  
112 (E) and soil samples (F) in response to R401 or its mutants. Prior to computing relative  
113 abundances, R401 reads have been *in silico*-depleted to visualize solely the effect on the  
114 other SynCom members. PERMANOVA analysis-derived  $p$ -values are represented as  
115 asterisks (\*\*, \*\*\*, indicate  $p < 0.001$  or  $0.001$ , respectively; n=18), coloured by the  
116 respective condition. PERMANOVA analysis on the full data set before (All data) or after  
117 (No HK) *in silico* depletion of HK samples are indicated in black;  $R^2$  represents the  
118 variance explained by R401 genotype.  
119

Supp. figure 6

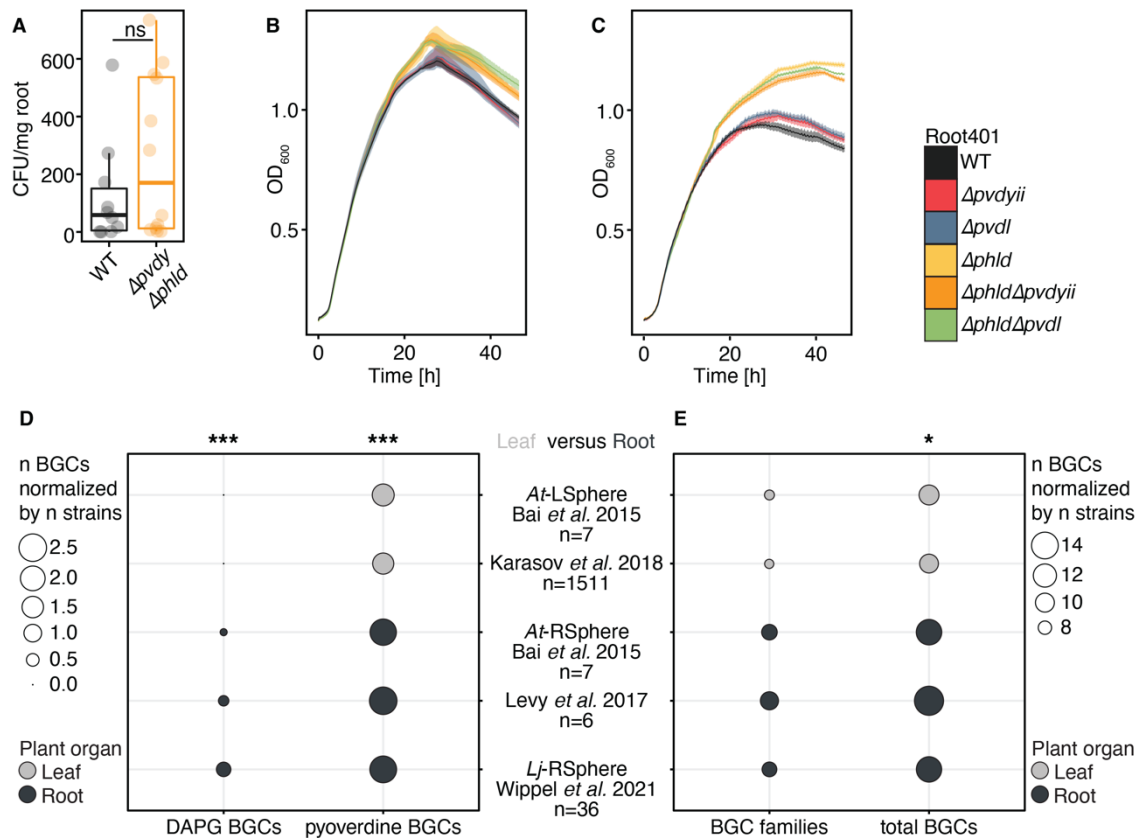

120

121 **Figure S6 R401 DAPG and pyoverdine BGCs are predominantly detected in the**  
 122 **genomes of root-derived *Pseudomonas sp.* isolates**

123 (A) Colonization efficiency as measured by colony forming units of R401 WT and the  
 124  $\Delta pvdl \Delta phld$  double mutant on *A. thaliana* roots in mono-associations in the Flowpot system  
 125 at 21 dpi. No statistical difference (ns) could be determined by Kruskal-Wallis followed by  
 126 Dunn's post-hoc test and Benjamini-Hochberg adjustment (n=12).

127 (B–C) Growth curves of R401 WT and mutants in artificial root exudate (ARE) liquid  
 128 medium (B) and ARE without any addition of iron (C); n=6. Artificial root exudates are  
 129 used to recapitulate the nutritional status in the vicinity of the root.

130 (D–E) Using antiSMASH, we predicted BGCs for the genomes of *Pseudomonas sp.*  
 131 isolates from different root and leaf derived culture collections. For each culture collection,  
 132 the number of DAPG and pyoverdine BGCs (D) and the number of detected BGC families  
 133 and total BGCs (E) is depicted. Dot size indicates number of detected BGCs normalized

134 by the number of tested strains (n). Asterisks highlight statistical significance between root  
135 and leaf culture collections as measured by Chi-Square test (\*, \*\*\*, indicate  $p < 0.05$ , and  
136 0.001, respectively).

137

### 138 **Supplementary tables**

139

140 All supplementary tables have been deposited at Edmond:

141 <https://doi.org/10.17617/3.6JTQY4>

142

143 **Table S1 mBA binary interaction data and SynCom selection.**

144

145 **Table S2 antiSMASH-based BGC predictions.**

146

147 **Table S3 Generated R401 and R569 mutants.**

148

149 **Table S4 Primers used in this study for amplification of the bacterial v5v7 *16S***  
150 **rRNA region and for generation and validation of bacterial mutants.**

151

152 **Table S5 Artificial root exudates and siderophore assay media.**

153

154

155

156 **Material Availability**

157 All generated bacterial mutant strains have been deposited in the bacterial culture  
158 collection of the Department of Plant Microbe Interactions at the Max Planck Institute for  
159 Plant Breeding Research in Cologne, Germany, and are available upon request from  
160 Stéphane Hacquard ([hacquard@mpipz.mpg.de](mailto:hacquard@mpipz.mpg.de)).

161

162 **Data and Code Availability**

163 Raw sequencing data from SynCom reconstitution experiments (MiSeq *16S* rRNA reads)  
164 has been deposited in the European Nucleotide Archive ENA at Accession: PRJEB56224.  
165 The circular PacBio-sequenced genome of R401 has been submitted to NCBI (BioProject:  
166 SUB12090952). The MS data of the comparative metabolomics are deposited and publicly  
167 available at GNPS as a MassIVE dataset at <ftp://massive.ucsd.edu/MSV000081381>. MS  
168 data of R401 are available at <ftp://massive.ucsd.edu/MSV000090791/>. Molecular  
169 networking jobs can be found under  
170 <https://gnps.ucsd.edu/ProteoSAFe/status.jsp?task=91cec5b4f0074e5b868273a811295303>  
171 (198 strain network) and  
172 <https://gnps.ucsd.edu/ProteoSAFe/status.jsp?task=511e72288abf4919b503e1784e183270>  
173 (interaction network). BGC predictions using antiSMASH can be found in **Table S2**. All  
174 supplementary tables have been deposited at Edmond: <https://doi.org/10.17617/3.6JTQY4>.  
175 All code and data files to reproduce the figures of this manuscript were deposited to  
176 <https://github.com/scriptsFG/Getzke-Hassani-et-al.-2023.git>.

177

178 **Material and Methods**

179 *Bacterial Strains*

180 The bacterial strains used in this study have been initially isolated from unplanted soil,  
181 *A. thaliana* roots or shoots (1) and are summarized in **Table S1**. *Ralstonia solanacearum*  
182 GMI1000 and GMI1600 have also been reported previously (2, 3). All mutants that were  
183 generated in the R401 or R569 backgrounds in this study have been deposited at the Max  
184 Planck Institute for Plant Breeding Research and are listed in **Table S3**.

185

186 *Plant Growth Conditions*

187 *A. thaliana* Col-0 wild-type (N60000) was obtained from the Nottingham Arabidopsis  
188 Stock Centre (NASC). *Arabidopsis thaliana* Col-0 seeds were sterilized using 70% ethanol  
189 and bleach. Seeds were submerged in 70% ethanol and left shaking at 40 rpm for 14  
190 minutes. Ethanol was removed before the seeds were submerged in 8.3% sodium  
191 hypochlorite (Roth) containing 1 µl of Tween 20 (Sigma-Aldrich) and left shaking at 40  
192 rpm for 4 minutes. Under sterile conditions, the seeds were washed 7x times and finally  
193 taken up with sterile 10 mM MgCl<sub>2</sub>. Seeds were left for stratification at 4 °C for 3 days.  
194 Seed sterility was confirmed by plating approx. 100 seeds on a 50% TSA plate.

195 *Flowpot*

196 Flowpots were assembled and inoculated as described below. Each Flowpot was first  
197 flushed with 50 ml sterile MiliQ water and then 50 ml half strength Murashige and Skoog  
198 medium with vitamins (½ MS; 2.2 g/l, Duchefa Biochemie, 0.5 g/l MES, pH 5.7)  
199 containing the bacterial inoculum. Per Flowpot, five surface-sterilized and stratified *A.*  
200 *thaliana* Col-0 seeds were pipetted. Microboxes were then incubated in a light cabinet  
201 under short day conditions (10 h light at 21 °C, 14 h dark at 19 °C) for 14 days and  
202 randomized every 2–3 days.

203 *Agar-media*

204 Surface-sterilized and stratified *A. thaliana* Col-0 seeds were sown on plates containing  
205 1% agar (Bacto Agar, Difco) in ½ MS medium supplemented with 0.5% sucrose and placed  
206 vertically in a climate chamber (Panasonic, MLR-352) and grown for six days (10 h light,

207 21 °C; 14 h dark, 19 °C). Using a forceps, uniform seedlings were then transferred to  
208 freshly prepared ½ MS plates without sucrose.

209

#### 210 *Bacterial culture conditions*

211 Bacteria were streaked from glycerol stocks (25% glycerol) on TSA plates (15 g/l Tryptic  
212 Soy Broth, Sigma Aldrich; with 10g/l Bacto Agar, Duchefa Biochemie) and grown at 25  
213 °C. Single colonies were inoculated into liquid 50% TSB (15 g/l Tryptic Soy broth, Sigma  
214 Aldrich) and grown until dense at 25 °C with 180 rpm agitation. Dense cultures were then  
215 stored at 4 °C and diluted 1 to 10 in TSB the day before the experiment and cultured at 25  
216 °C with 180 rpm agitation overnight to ensure sufficient cell densities for slow- and rapidly  
217 growing bacteria. Glycerol stocks were stored at -80 °C and kept on dry ice when  
218 transported.

#### 219 *Screen for antagonistic interbacterial interactions*

220 For the initial mBA experiment (**Fig. 1**), bacterial strains were cultured for seven days in  
221 25% TSB (7.5 g/l Tryptic Soy Broth, Sigma-Aldrich). Briefly, 100 µl of a bacterial solution  
222 were re-suspended in 50 ml cooled (~38 °C), but still molten, 25% TSA (15 g/l Bacto-Agar,  
223 Duchefa Biochemie) and poured into a square petri dish (120x120 mm). After medium  
224 solidification, 24 bacterial isolates were spotted on top of the medium using a multi-stamp  
225 replicator. The replicator was sterilized by dipping in 70% EtOH (v/v) followed by flaming  
226 and cooling. The screen comprising 39,204 binary interactions was conducted once and  
227 validated by randomly re-screening 7,470 interaction pairs as described above. All bacterial  
228 strains that showed antagonistic activity were re-screened two more times. For the  
229 *Ralstonia* inhibition screen, *R. solanacearum* GMI1000 was pre-cultured for two days in  
230 CPG medium (1% peptone, 0.5% glucose and 0.1% casamino acids; pH7.0). Before  
231 spotting the bacterial cultures, each CPG agar plate (1% Peptone, 0.5% D-glucose, 0.1%  
232 casamino acids and 1.5% agar; pH 7.0) was overlaid with 5 ml of *R. solanacearum*  
233 suspension (50 µl of pre-cultured *R. solanacearum* in pure sterile water). Excess *R.*  
234 *solanacearum* suspension was removed and the plates were briefly dried, then 5 µl of the  
235 bacterial culture were spotted onto the *R. solanacearum*-overlaid plates. All isolates were  
236 tested three times. For all subsequent halo assays, strains were cultivated in 50% TSB until

237 turbidity, stored at 4 °C and diluted 1:10 in 50% TSB one day before the experiment.  
238 Bacterial cultures were pelleted at 4,000 rpm for 15 min. The resulting bacterial pellets  
239 were subsequently washed 3 times and resuspended in 1 ml 10 mM MgCl<sub>2</sub>. OD<sub>600</sub> were  
240 measured and set depending on the strain. One hundred microliters bacterial culture were  
241 inoculated per 50 ml 25% TSA. After drying, up to nine different 3- $\mu$ l droplets of bacterial  
242 suspensions with 0.4 OD<sub>600</sub> were applied with equal distances. For all experiments, plates  
243 were incubated at 25 °C for up to 96 hours and photographs were taken thereafter for  
244 quantitative image analysis. The size of the halo of inhibition was measured using ImageJ  
245 with up to five separate measurements, which were subsequently averaged to reduce  
246 variation. Raw data of Fig. 1 are indicated in **Table 2**.

247

#### 248 *Metabolomic Analyses*

249 Metabolites were extracted from individual isolates (n = 198) grown on the same agar  
250 medium used in mBA experiments with two organic solvents with different polarity, ethyl  
251 acetate and methanol, to capture greater small molecule diversity. Each bacterial strain was  
252 grown separately on 25% TSA plates (25% BBL™ Trypticase™ Soy, BD with 1.8%  
253 Bacto-Agar; BD, Germany). After seven days of incubation at 25 °C, three to four agar  
254 plugs were taken from the periphery and inside of the bacterial colony. Agar plugs were  
255 crushed and washed with 500  $\mu$ l water followed by extraction in 500  $\mu$ l ethyl acetate and  
256 methanol. Between each extraction step, samples were vortexed for 30–45 s. After each  
257 extraction, the solvents were evaporated, and the residue was redissolved in 500  $\mu$ l LC-  
258 MS-grade methanol and filtered through a 0.2- $\mu$ m membrane into HPLC vials. Solvents  
259 for blanks (uninoculated medium) were extracted according to the same protocol. The  
260 extraction protocol was also used to analyse the inhibition zones upon inter-bacterial  
261 interactions. To this end, a bacterial lawn of a sensitive target strain, either R472D3, R480  
262 or R553, was prepared as top agar and the antibiotic producer strains (R63, R68, R71,  
263 R342, R401, R562, R569, R690, R920 and R1310, respectively) were inoculated on top.  
264 The agar plugs were taken from the zone of inhibition and inside of the antibiotic-  
265 producing colony. In total, 20 interactions were analysed. All samples were analysed by  
266 HPLC-MS/MS on a micrOTOF-Q mass spectrometer (Bruker) with ESI-source coupled

267 with a HPLC Dionex Ultimate 3000 (Thermo Scientific, Germany) using a Zorbax Eclipse  
268 Plus C18 1.8  $\mu\text{m}$  column, 2.1 $\times$ 50 mm (Agilent). The column temperature was 45 °C. MS  
269 data were acquired over a range 100–3000 m/z in positive mode. Auto MS/MS  
270 fragmentation was achieved with rising collision energy (35–50 keV over a gradient from  
271 500–2000 m/z) with a frequency of 4 Hz for all ions over a threshold of 100. uHPLC began  
272 with 90% H<sub>2</sub>O containing 0.1% acetic acid. The gradient started after 0.5 min to 100%  
273 acetonitrile (0.1% acetic acid) in 4 min. Two microliters sample solution were injected to  
274 a flow of 0.8 ml/min. All MS/MS data were converted to ‘.mzxml’ format and transferred  
275 to the GNPS server (gnps.ucsd.edu) (4). Molecular networking was performed based on  
276 the GNPS data analysis workflow using the spectral clustering algorithm (5). The data was  
277 filtered by removing all MS/MS peaks within +/- 17 Da of the precursor m/z. MS/MS  
278 spectra were window-filtered by choosing only the top 6 peaks in the +/- 50 Da window  
279 throughout the spectrum. The data was then clustered with MS-Cluster with a parent mass  
280 tolerance of 0.02 Da and a MS/MS fragment ion tolerance of 0.02 Da to create consensus  
281 spectra. Consensus spectra that contained less than two spectra were discarded. Networks  
282 were then created from the single cultivation and from the competition experiments. Edges  
283 were filtered to have a cosine score above 0.5 (0.6 for interaction network) and more than  
284 four matched peaks. Further edges between two nodes were kept in the network only if  
285 each of the nodes appeared in each other's respective top ten most similar nodes. Sample  
286 attributes were assigned to the data files (strain, genus, family, order, class phylum  
287 extraction solvent). For the network analysis, all nodes that contained ions from the blank  
288 medium were removed. The network was visualized using Cytoscape 3.5.1.

289

#### 290 *Detection of R401 DAPG and pyoverdine*

291 For the detection of iron-chelating compounds, a R401 preculture was grown over night in  
292 5 ml LB medium at 30 °C and 200 rpm. Before inoculation of the main culture, cells were  
293 washed twice with the main culture medium to remove potential traces of iron from the  
294 medium. Erlenmeyer flasks containing 20 ml of modified MM63 (KH<sub>2</sub>PO<sub>4</sub> 13.61 g/L KOH  
295 4.21 g/L, (NH<sub>4</sub>)SO<sub>4</sub> 1.98 g/L, MgSO<sub>4</sub>\*7 H<sub>2</sub>O 0.25 g/L, NaCl 0.5g/L, Glucose\*H<sub>2</sub>O 5,00  
296 g/L, pH 7.1 KOH/HCl) with or without addition of 0.0011 g/L FeSO<sub>4</sub>\*7 H<sub>2</sub>O were



297 inoculated with 100 µl of preculture and cultivated for 6 days at 30 °C and 200 rpm. Every  
298 second day, 0.5 ml sample were taken, cells were removed by centrifugation and 5 µl of  
299 supernatant were analysed on a Bruker microTOFq-II high-resolution mass spectrometer  
300 coupled to an Agilent 1290 UPLC system with an Acquity UPLC BEH C-18 reverse phase  
301 column, run in a gradient of MeCN/H<sub>2</sub>O + 0.1% formic acid. Higher accuracy  
302 measurements were performed on a maXis-II qTOF, coupled to an identical LC setup as  
303 described earlier.

304

#### 305 *PacBio sequencing and assembly*

306 PacBio-sequenced reads were obtained from Max Planck Genome Centre  
307 (<https://mpgc.mpiiz.mpg.de>). PacBio 2kb sequence control reads were removed with blasr  
308 (6). Reads were assembled using Flye v2.8-b1673 (7) and polished four times using the  
309 internal function. Then, assembly went through a final polishing step with Medaka v1.0.3  
310 (Oxford Nanopore Technologies Ltd, 2018). Annotation was conducted using Prokka 1.12-  
311 beta (8), and output files (.ffn, .faa, .gff) were parsed with a custom Python script. Then,  
312 we examined; (I) statistics of assemblies and visualisation of assemblies with Bandage  
313 v0.8.1 (9); (II) integrity of assemblies using BUSCO v4.0.6 (10) with bacteria\_odb10  
314 (<https://busco-data.ezlab.org/v4/data/lineages/>); and (III) potential contamination with  
315 other species with Blobtools2 v2.2 (11). Phylogenetic assignment of R401 as *Pseudomonas*  
316 *brassicacearum* is based whole genome phylogeny.

317

#### 318 *BGC prediction using antiSMASH*

319 Bacterial genomes were downloaded from “[www.at-sphere.com](http://www.at-sphere.com)” (1) or NCBI and  
320 submitted to <https://antismash.secondarymetabolites.org/> version 6.0 (12). Output data  
321 from antiSMASH analysis are listed as BGC classes and predicted BGCs for each genome  
322 in **Table S2**. Only high-quality genomes, as assessed by CheckM with ≥90% completeness  
323 and ≤5% contamination ratio were used for the analysis. For R401, the PacBio-sequenced  
324 high-quality genome was used for BGC prediction using antiSMASH.

325

326 *Mutant generation*

327 Marker-free knockouts in R401 were generated through homologous recombination using  
328 the cloning vector pK18mobsacB (GenBank accession: FJ437239), which encodes the  
329 *kanR* and *sacB* genes conferring resistance to kanamycin and susceptibility to sucrose,  
330 respectively. In this method, upstream and downstream sequences of the gene to be deleted  
331 are integrated into the pK18mobsacB suicide plasmid by Gibson assembly (13). The  
332 resulting plasmid is transformed into BW29427 *E. coli* cells and subsequently conjugated  
333 into R401. The plasmid is then integrated into the chromosome by homologous  
334 recombination and deletion mutants are generated by a second sucrose counter-selection-  
335 mediated homologous recombination event. The protocol is adapted from (14).

336

337 *Generation of pK18mobsaB-derived plasmid containing flanking regions of the*  
338 *gene of interest.*

339 Primers were designed to amplify a 750-bp DNA sequence (*i.e.*, flanking region) directly  
340 upstream and downstream of the target region, sharing terminal sequence overlaps to the  
341 linearized pK18mobsacB vector and the other respective flanking region using Geneious  
342 Prime. R401 genomic DNA was isolated from 6 µl dense R401 culture in 10 µl of buffer I  
343 (pH 12) containing 25 mM NaOH, 0.2 mM EDTA at 95 °C for 30 min, before the pH was  
344 readjusted using 10 µl of buffer II (pH 7.5) containing 40 mM Tris-HCl. The R401 genomic  
345 DNA was used for amplification of the flanking regions through PCR using the respective  
346 flanking region-specific primer combinations (**Table S4**). PCR was conducted with 0.2 µl  
347 Phusion Hot Start High-Fidelity DNA polymerase (New England Biolabs) in 20-µl  
348 reactions containing 4 µl 5x Phusion HF buffer (New England Biolabs), 0.4 µl 10 mM  
349 dNTPs, 1 µl of 10 µM forward primer, 1 µl of 10 µM reverse primer, 2 µl of R401 genomic  
350 DNA as template, filled up to 20 µl with nuclease-free water. The tubes were placed into  
351 a preheated (98 °C) thermal cycler set at the following program: 98 °C for 30 s, 35 cycles  
352 of 98 °C for 7 s, 60 °C for 20 s, 72 °C for 15 s, then a final extension at 72 °C for 7 min.  
353 Five microliters of the PCR product were combined with 1 µl Orange DNA Loading Dye  
354 (6x; New England Biolabs), loaded on 1% agarose gels containing 0.05% EtBr, and run at  
355 110 mV. After confirmation of successful amplification, the PCR product was purified

356 using AMPure XP (Beckman-Coulter) and subsequently quantified using Nanodrop  
357 (Thermo Fisher Scientific). Plasmid purification was performed on an *E. coli* culture  
358 containing plasmid pK18mobsacB using the QIAprep Spin Miniprep Kit for plasmid DNA  
359 purification (QIAGEN) following the manufacturer's instructions. The pK18mobsacB  
360 vector was then amplified and linearized through PCR using the PKSf and PKSR primers  
361 (**Table S4**). PCR was conducted with 0.2 µl Phusion Hot Start High-Fidelity DNA  
362 polymerase (New England Biolabs) in 20-µl reactions, largely as described above with 1  
363 µl 0.1 ng/µl pK18mobsac as a template. Annealing temperature was decreased to 55 °C and  
364 extension time increased to 150 s for each cycle. Template DNA was digested by DpnI  
365 (New England Biolabs) in 50-µl reactions containing 1 µl DpnI, 1 µg DNA, 5 µl Cutsmart  
366 buffer (New England Biolabs) and filled up to 50 µl with nuclease-free water. The tubes  
367 were then incubated at 37 °C for 15 min followed by heat inactivation at 80 °C for 20 min.  
368 Five microliters of the DpnI-digested plasmid were combined with 1 µl Orange DNA  
369 Loading Dye and analysed by DNA agarose electrophoresis. Upon successful verification  
370 of amplification and digestion, the remaining sample was purified using AMPure XP and  
371 subsequently quantified using Nanodrop. Linearized pK18mobsacB and both flanking  
372 regions were mixed in a molar ratio of 1:3:3 into a 10-µl total volume, added to 10 µl 2X  
373 Gibson Assembly® Master Mix (New England Biolabs) and incubated at 50 °C for 1 h.

374

#### 375 *Transformation into chemically competent E. coli BW29427 cells*

376 The vector was transformed into 50 µl chemically competent BW29427 *E. coli* cells  
377 according to the following heat shock protocol: 2 µl of the vector were gently mixed with  
378 50 µl of competent cells, and the resulting mixture was incubated on ice for 30 min. The  
379 mixture was transferred to a water bath at 42 °C for 1 min and put back on ice for 2 min.  
380 Then, 1 ml of 50% TSB with 50 µg/ml diaminopimelic acid (DAP; Sigma-Aldrich) was  
381 added to the heat-shocked cells, the mixture was left to regenerate at 37 °C for 1 h and then  
382 plated on 50% TSA containing 25 µg/ml Kanamycin (Kan) and 50 µg/ml DAP. The plates  
383 were incubated at 37 °C overnight. Resulting colonies were validated by colony PCR using  
384 the M13F and M13R primers. Colony PCR was performed on at least four separate colonies  
385 with 0.4 µl DFS-Taq polymerase (BIORON) in 25 µl reactions containing 2.5 µl 10x

386 incomplete buffer (BIORON), 0.5 10 mM MgCl<sub>2</sub>, 0.5 µl 10 mM dNTPs, 0.75 µl 10 µM  
387 forward primer, 0.75 µl 10 µM reverse primer, a small fraction of a colony and filled up to  
388 25 µl with nuclease-free water. The tubes were placed in a thermocycler set at the following  
389 program: 94 °C for 2 min, 35 cycles of 94 °C for 30 s, 55 °C for 30 s, 72 °C for 2 min, then  
390 a final extension at 72 °C for 10 min. Five microliters of the PCR product were combined  
391 with 1 µl Orange DNA Loading Dye and analysed by DNA agarose electrophoresis.  
392 Positive colonies were purified by streaking on new 50% TSA plates containing 25 µg/ml  
393 Kan and 50 µg/ml DAP and further verified by Sanger sequencing (Eurofins Scientific)  
394 following the manufacturer's protocol.

395

396 *Conjugation of E. coli and R401 and selection for first homologous recombination*  
397 *event*

398 *E. coli* BW29427 cells containing the plasmid and R401 were inoculated into 4 ml of 50%  
399 TSB containing 25 µg/ml Kan and 50 µg/ml DAP or 50% TSB and incubated overnight at  
400 37 °C with 180 rpm agitation or 25 °C with 180 rpm agitation, respectively. Cells were  
401 harvested by centrifugation at 8,000 rpm for 2 min at room temperature, then washed 3x  
402 and subsequently resuspended in 1 ml of 50% TSB followed by centrifugation, after which  
403 the supernatant was discarded. After quantifying OD<sub>600</sub>, both cultures were mixed to equal  
404 parts and approx. 10x concentrated by centrifugation. The bacterial suspension was plated  
405 on 50% TSA plates containing 50 µg/ml DAP and incubated at 25 °C overnight to allow  
406 for conjugation events. The mating patches were scraped of the plate and resuspended in 1  
407 ml 50% TSB. Then, 100 µl were spread on 50% TSA plates containing 25 µg/ml Kan and  
408 50 µg/ml Nitrofurantoin (Nitro; Sigma-Aldrich; to counter-select *E. coli*) and incubated at  
409 25 °C. Colonies were validated for successful genomic insertion of the plasmid *via* colony  
410 PCR using a primer specific to the genomic DNA approx. 150 bp upstream of the upward  
411 flanking region (upup) and the plasmid specific M13F primer. Colony PCR was performed  
412 on at least 15 separate colonies and a WT control with 0.4 µl DFS-Taq polymerase in 25-  
413 µl reactions as described previously, but with an annealing temperature of 60 °C. Five  
414 microliters of the PCR product were combined with 1 ml Orange DNA Loading Dye and

415 analysed by DNA agarose electrophoresis followed by Sanger sequencing following the  
416 manufacturer's protocol.

417

418 *Sucrose counter-selection to induce the second homologous recombination event*

419 A R401 colony with a successful genomic insertion of the plasmid was resuspended from  
420 a plate into 1 ml of 50% TSB. The cell density in the medium was then measured using the  
421 Multisizer 4e Coulter Counter (Beckman Coulter) following the manufacturer's protocol.  
422 One hundred microliters of 500 cells/ $\mu$ l, 5,000 cells/ $\mu$ l and 50,000 cells/ $\mu$ l dilutions were  
423 spread on three separate 50% TSA plates containing 300 mM sucrose. The plates were  
424 incubated at 25 °C for approx. 48 h. At least 30 colonies were examined by colony PCR  
425 using the respective upup and dwdw primers. Colony PCR was performed with 0.4  $\mu$ l DFS-  
426 Taq polymerase in 25- $\mu$ l reactions as described previously with an annealing temperature  
427 of 60 °C. Five microliters of the PCR product were combined with 1  $\mu$ l Orange DNA  
428 Loading Dye and analysed by DNA agarose electrophoresis. Positive colonies were  
429 purified by streaking on new 50% TSA plates and further verified by Sanger sequencing  
430 (Eurofins Scientific) following the manufacturer's protocol. They were also streaked on  
431 50% TSA containing 25  $\mu$ g/ml Kan to verify loss of the plasmid. A second colony PCR  
432 was performed on positive colonies and a wt control to validate the absence of the GOI,  
433 using a forward (inF) and reverse (inR) primer inside the GOI. Colony PCR was performed  
434 with 0.4  $\mu$ l DFS-Taq polymerase in 25  $\mu$ l reactions as described previously. Five  
435 microliters of the PCR product were combined with 1 ml Orange DNA Loading Dye and  
436 analysed by DNA agarose electrophoresis. Upon successful verification, 4 ml of 50% TSB  
437 were inoculated with a positive colony and grown overnight at 25 °C at 180 rpm. Finally,  
438 750  $\mu$ l of the overnight culture were added to 750  $\mu$ l of 50% glycerol in an internally  
439 threaded 1.8 ml Nunc CryoTube, gently mixed, and stored at -80 °C.

440

441 *Establishment of mini-Tn5 transposon mutant collections in R401 and R569*

442 Mini Tn5-mutant collections of R401 and R569 were established similarly with only minor  
443 changes as described below. Liquid cultures of R401 or R569 and *E. coli* strain BW29427

444 carrying plasmid pUTmTn5Km2 (15) were grown overnight in no antibiotics or 25 µg/ml  
445 Kan and 50 µg/ml DAP at 25 °C or 37 °C, respectively. Conjugation was carried out as  
446 described above in “*Conjugation of E. coli and R401 and selection for first homologous*  
447 *recombination event*”. For R401, the mating patch was taken up in 1 ml 50% TSB liquid  
448 medium and subsequently plated on 50% TSA plates containing 25 µg/ml Kan and  
449 50 µg/ml Zeocin in four different dilutions (undiluted, 1:3, 1:4, and 1:5) and left to grow  
450 at 25 °C for 48 h. Individual colonies were picked in 100 µl sterile 50% TSB in 96-well  
451 culture plates, sealed and left to grow at 25 °C and 180 rpm for 24 h. Subsequently, 100 µl  
452 50% glycerol were added to each well and plates were frozen until further processing. The  
453 outer rows and columns were left uninoculated as to avoid positional effects in the  
454 subsequent forward genetic screen. For R569, resuspended mating patches were stocked at  
455 -80 °C in 700-µl aliquots using a final concentration of 25% Glycerol. 1:4 dilutions were  
456 plated onto 50% TSA plates supplemented with 120 µg/ml Kan, 50 µg/ml Rifampicin and  
457 50 µg/ml Zeocin and incubated at 25 °C for 48h. Individual colonies were inoculated in  
458 100 µl 50% TSB supplemented with the same antibiotics at the same concentrations in 96-  
459 well plates and incubated at 25 °C and 180 rpm for 48 h. Then, 100 µl 50% glycerol were  
460 added to each culture and plates were frozen at -80 °C.

461

#### 462 *Mini-Tn5 transposon mutant screen for loss of R401s growth inhibition of Rs GMI1600*

463 Each R401 mini-Tn5 transposon mutant was screened individually for loss of inhibitory  
464 activity against GFP-expressing *Rs* GMI1600 and for wild type-like growth, as we  
465 observed in first trials that mutants that are impaired in growth are also more likely to have  
466 reduced inhibitory activity against *Rs* GMI1600. This screen was conducted in a 96-well  
467 plate format with GFP expression of *Rs* GMI1600 in response to individual R401 mutants  
468 and Abs<sub>600</sub> of axenically grown, individual R401 mutants as readouts. Therefore, for each  
469 mutant, two wells were inoculated in parallel, one in the presence of *Rs* GMI1600 and one  
470 grown axenically. *Rs* GMI1600 was streaked on 50% TSA plates and left to grow at 25 °C  
471 for 96 h. The same day, R401 mutants were each inoculated into 150 µl Artificial Root  
472 Exudates (ARE; **Table S5**) in 96-well culture plates (‘R401 preculture plates’) from  
473 glycerol stocks using a multi-stamp replicator and left to grow at 25 °C and 150 rpm for 96

474 h until saturation. Then, a *Rs* GMI1600 preculture was inoculated into 10 ml ARE and  
475 grown overnight at 25 °C and 150 rpm. Approximately 24 h later, the preculture was 1:10  
476 diluted with 90 ml ARE and left to grow under the same conditions. Approximately 24 h  
477 later, the 100 ml *Rs* GMI1600 culture was concentrated by centrifugation at 4,000 rpm for  
478 15 min, washed 3x and resuspended in ARE. Subsequently, OD<sub>600</sub> was quantified and set  
479 to 0.2 in ARE. Then, 75 µl of this *Rs* GMI1600 suspension were transferred to each well  
480 of a sterile 96-well bacterial culture plate (Greiner-CELLSTAR-96-Well plate, transparent,  
481 flatbottom; Sigma-Aldrich) per ‘R401 preculture plate’, referred to as the ‘R401-*Rs*  
482 interaction plate’. Per ‘R401 preculture plate’ one sterile 96-well bacterial culture plate  
483 (Greiner-CELLSTAR-96-Well plate, transparent, flatbottom; Sigma-Aldrich) was filled  
484 with 150 µl ARE per well and R401 mutants were inoculated from the ‘R401 preculture  
485 plate’ using a multi-stamp replicator; this plate is referred to as the ‘axenic R401 plate’.  
486 After mixing by pipetting, 75 µl R401 mutant suspension were transferred from the ‘axenic  
487 R401 plate’ to the ‘R401-*Rs* interaction plate’. Finally, 75 µl ARE were added to each well  
488 of the ‘axenic R401 plate’. The ‘axenic R401 plate’ and ‘R401-*Rs* interaction plate’ thereby  
489 contain the same volume and concentration of R401 mutants, while the latter also contains  
490 a final concentration of OD<sub>600</sub> 0.1 *Rs* GMI1600 per well. Both plates were closed with a  
491 lid and incubated at 25 °C and 150 rpm for 48 h. Subsequently, Abs<sub>600</sub> was measured for  
492 the ‘axenic R401 plate’ and GFP fluorescence was quantified at  $\lambda_{\text{excitation}}=475$  nm and  
493  $\lambda_{\text{emission}}=510$  nm for the ‘R401-*Rs* interaction plate’. Both measurements were taken using  
494 a microplate reader (Infinite M200 PRO, Tecan). Subsequently, candidate R401 mutants  
495 were selected based on two criteria: (I) loss of *Rs* GMI1600 inhibition; a mutant was  
496 considered a candidate if the GFP fluorescence in the ‘R401-*Rs* interaction plate’ was lower  
497 than 3-fold the absolute deviation around the median (MAD) (16) compared to the  
498 respective plates median, and (II) wild-type-like growth; a mutant was considered a  
499 candidate if the Abs<sub>600</sub> in the ‘axenic R401 plate’ was not lower than 3x MAD compared  
500 to the respective plate’s median. Candidate R401 mutants were freshly picked from  
501 glycerol stocks and validated twice more independently using the same assay. Finally, 38  
502 mutants that showed wild-type-like growth and robustly reduced inhibitory activity against  
503 *Rs* GMI1600 were subsequently tested in an orthogonal mBA experiment with *Rs* as target  
504 bacterium, as described before.

505 *Mini-Tn5 transposon mutant screen for lack of pyoverdine fluorescence of R569*  
506 R569 mini-Tn5 mutants were cultured in 96 well plates at 25 °C and 180 rpm for five days  
507 in 50% TSB medium. For the initial mutant screen, fluorescence was acquired at  
508  $\lambda_{\text{excitation}}=395$  nm and  $\lambda_{\text{emission}}=470$  nm in a microplate reader (Infinite M200 PRO, Tecan).  
509 Out of ~2,000 mutants analysed, the fluorescence-based screening identified twelve R569  
510 mutants that showed severely reduced pyoverdine-specific fluorescence but retained  
511 median-like growth behaviour (Thresholds: -6x MAD fluorescence, >-1x MAD Abs<sub>600</sub>).  
512 For validation, cultures were pre-grown for five days in 50% TSB before sub-culturing into  
513 fresh siderophore medium (see **Table S5**) and growth for five additional days. Finally,  
514 bacterial culture density (Abs<sub>600</sub>) was determined, and pyoverdine-specific fluorescence of  
515 bacterial culture supernatants was captured at  $\lambda_{\text{excitation}}=410$  nm and  $\lambda_{\text{emission}}=500$  nm. For  
516 comparison between genotypes, fluorescence capacity was calculated by dividing the  
517 pyoverdine-specific fluorescence by culture density.

518

519 *Identification of mini-Tn5 transposon integration sites in the genomes of R401 and R569*  
520 The chromosomal mini-Tn5 transposon integration sites in the R401 or R569 genomes  
521 were determined similarly as described before (15). Briefly, a colony from each strain was  
522 resuspended in 20  $\mu$ l of sterile deionized water. Subsequently, a two-step PCR (TAIL-  
523 PCR) was performed starting with an arbitrarily primed PCR (PCR1), followed by a nested  
524 PCR (PCR2) on the generated product using the primers as described (**Table S4**). PCR  
525 reactions were conducted using the BIORON DFS-Taq polymerase reaction kit according  
526 to the manufacturer's instructions. One microliter of a resuspended bacterial colony was  
527 used as template for PCR1 in a total PCR reaction volume of 25  $\mu$ l. PCR1 was conducted  
528 using primers JO4 and JO28 and the following steps were applied: 95 °C for 5 min, six  
529 cycles of 95 °C for 15 sec, 30 °C for 30 sec and 1 min elongation at 72 °C, followed by 30  
530 cycles with 95 °C for 15 seconds, 45 °C for 30 seconds and 1 min elongation at 72 °C.  
531 Final elongation was for 5 min at 72°C. PCR2 was conducted using 0.3  $\mu$ l of the PCR1  
532 product and the primers JO1 and JO5. The following steps were applied: 95 °C for 5 min  
533 followed by 30 cycles of 95 °C for 15 sec, 57 °C for 30 sec and 1 min elongation at 72 °C.  
534 Final elongation was for 5 min at 72°C. R401 or R569 wild type was included to account



535 for unspecific amplifications. PCR products were separated by agarose gel electrophoresis.  
536 One of the most prominent bands from each sample was extracted using the Nucleospin  
537 Gel and PCR clean-up kit (Macherey-Nagel). The PCR product was eluted into a final  
538 buffer volume of 20  $\mu$ l; DNA concentration was determined with a spectrophotometer  
539 (NanoDrop One, Thermo Scientific), and 75 ng of each product were sent for Sanger  
540 sequencing (Eurofins genomics). Finally, chromosomal Tn5 integration sites were assessed  
541 by alignment of the obtained sequences flanked by the integrated Tn5 transposon in the  
542 R401 or R569 genome using the Geneious Prime or CLC Genomics Workbench software,  
543 respectively (Qiagen Digital Insights). Matching open reading frames (ORFs) were further  
544 aligned to the NCBI BLAST (17) nucleotide and protein data base (using BLASTn and  
545 BLASTp algorithm).

546

#### 547 *Complementation of R401 $\Delta pvdY$*

548 Complementation of R401  $\Delta pvdY$  was conducted by expressing the coding region of R401  
549 *pvdY* under its putative native promoter from a low-copy plasmid in the  $\Delta pvdY$  mutant  
550 background. Plasmid construction was conducted using Gibson assembly as described  
551 before. In brief, the coding region of R401 *pvdY* was co amplified with a 1.5 kb region  
552 upstream of the gene and ligated into a linearized pSEVA221 (18) vector backbone. This  
553 vector was integrated into *E. coli* BW29427 cells and subsequently integrated into R401  
554  $\Delta pvdY$  via bi-parental conjugation.

555

#### 556 *In vitro iron mobilization assay*

557 The capability of R401 and R569 mutants of solubilizing inaccessible ferric iron was tested  
558 using a previously described photometric assay (19). Bacteria were cultured at 25 °C and  
559 180 rpm for five days in 50% TSB and subsequently subcultured and 1:50 diluted in  
560 siderophore medium (**Table S5**). Diluted cultures were grown for an additional five days  
561 under the same conditions. At five days post inoculation (dpi), bacterial load was quantified  
562 by OD<sub>600</sub> determination. Subsequently, cells were pelleted by centrifugation for 15 min at  
563 4,000 rpm. The cell-free supernatant was diluted 5-fold with 10 mM MgCl<sub>2</sub> and 25  $\mu$ l were  
564 mixed with 100  $\mu$ l of CAS assay solution (20) in three technical replicates and incubated

565 for approx. 40 min at room temperature in the dark. Using an Infinite 200 PRO plate reader  
566 (TECAN), Abs<sub>636</sub> was measured as an indication for the transition from complexed iron  
567 (blue complex) to solubilized or siderophore-bound iron (yellow). Finally, bacterial iron  
568 mobilizing capacity was computed according to the following formula:

$$\begin{aligned} 569 \quad & Fe\text{-mobilizing capacity} \left[ \frac{\mu M Fe}{OD_{600}} \right] \\ 570 \quad & = \frac{\left( \frac{(Abs_{636}(Medium) - Abs_{636}(Sample))}{(Abs_{636}(Medium))} \right) * 2 \text{ nmol}}{(Volume(Supernatant) * OD_{600})} \end{aligned}$$

571

#### 572 *Validation of bacterial growth rates*

573 The growth of individual R401 mutants and wild type was assessed by continuously  
574 measuring OD<sub>600</sub> of actively growing bacterial cultures in an Infinite 200 PRO plate reader  
575 (TECAN) over 48 h at 25 °C and approx. 300 rpm. Overnight cultures in 50% TSB were  
576 pelleted and washed as described before. Subsequently, OD<sub>600</sub> was measured and set to  
577 0.02 in either artificial root exudates (ARE) or ARE lacking FeCl<sub>3</sub>. Composition of ARE  
578 was adopted from (21) and can be found in **Table S5**.

579

#### 580 *SynCom selection*

581 The 18-member SynCom utilized in our study was designed to allow for strain-specific  
582 tracking of each strain based on the bacterial v5v7 16S rRNA region while incorporating a  
583 taxonomically diverse set of strains spanning all core classes that stably associate with  
584 Arabidopsis roots across a European transect, as well as soil-derived strains (22).  
585 Furthermore, we aimed to represent strains that were either sensitive or non-sensitive to  
586 R401 based on mBA experiments approximately at a ratio that is representative at least for  
587 the tested strains in the At-Sphere. The size of the 18-member SynCom was based on prior  
588 experiences, as similarly sized communities were shown to be easily tractable while at the  
589 same time sufficiently complex to recapitulate host preference in the root microbiota of  
590 Arabidopsis and Lotus in natural soils, an important community-level microbiota trait (23).

591

592 *Microbiota reconstitution in the gnotobiotic Flowpot system*

593 Flowpot assembly was performed according to (24) with minor adjustments. A 2:1 mixture  
594 of peat potting mix and vermiculite was used as a matrix. The matrix was sterilized two  
595 times (25 min liquid cycle (121 °C) and 45 min solid cycle (134 °C)) and stored at 60 °C  
596 until completely dry. Prior to Flowpot assembly, the matrix was rehydrated with sterile  
597 MiliQ water. Flowpots were assembled by adding a layer of glass beads to the conical end  
598 of a truncated syringe, followed by a layer of the rehydrated, sterile substrate, subsequently  
599 covered with a sterile mesh secured by a cable tie. Assembled Flowpots were sterilized on  
600 a 25 min liquid cycle, stored at 60 °C overnight and sterilized twice on a 45 min solid cycle.  
601 Bacterial strains, cultivated as described before, were harvested, 3x washed and pooled in  
602 equal ratios. Then, 1.25 ml bacterial pool (OD<sub>600</sub> 1.0) were added to 500 ml of ½ MS  
603 medium for a final bacterial OD<sub>600</sub> of 0.0025. Flowpots were first flushed with sterile MiliQ  
604 water, then inoculated with 50 ml of ½ MS. Eight inoculated Flowpots were placed into  
605 each sterile microbox (TP1200, Sac O2) and stored at room temperature overnight. Exactly  
606 five sterilized seeds were sown per Flowpot and left to grow under the previously described  
607 conditions. At 21 dpi, shoot fresh weight was measured individually for each plant. Roots  
608 from a single Flowpot were thoroughly cleaned from soil particles in sterile water using  
609 tweezers. Six representative Flowpots were selected for harvesting root and matrix  
610 samples. Cleaned roots from each Flowpot were pooled in 2 ml lysing matrix E tubes (MP  
611 Biomedicals), snap-frozen and stored at -80 °C until further use. Additionally, <100 mg of  
612 soil were taken from each Flowpot, snap-frozen and stored in weighed 2 ml lysing matrix  
613 E tube (MP Biomedicals) at -80 °C until further use.

614

615 *Mono-association experiment of R401 on A. thaliana seedlings in agar plates*

616 This protocol is adapted from (25). In brief, *A. thaliana* seeds were sterilized, germinated,  
617 and transferred to ½ MS agar plates without sucrose, as described before. After transfer of  
618 seedlings, plants were grown for another 14 days under the same conditions. R401 wild-  
619 type and mutants were grown in 50% TSB overnight as described before. Bacterial cells  
620 were pelleted by centrifugation, washed 3x in 10 mM MgCl<sub>2</sub> and OD<sub>600</sub> was measured and  
621 adjusted to 0.0001. Agar plates were flushed with 15 ml of bacterial suspension for 5 min.

622 The bacterial suspension were removed, and plants were carefully transferred to new  $\frac{1}{2}$   
623 MS agar plates. After 24 h, roots were cut using a sterile scalpel and collected in pre-  
624 weighed, sterile 2 ml tubes containing 1 steel bead (3 mm diameter). Tubes were weighed  
625 again to assess the root fresh weight. Subsequently, roots were ground in a Precellys 24  
626 TissueLyser (Bertin Technologies) for 2 x 30 s at 6,200 rpm at 15 s intervals. Then, 250  $\mu$ l  
627 of sterile 10 mM MgCl<sub>2</sub> were added to each tube and roots were ground again under the  
628 same conditions. Each sample was subsequently 5x 1:10 diluted in sterile 10 mM MgCl<sub>2</sub>.  
629 Undiluted samples and each dilution were plated on 50% TSA square plates, dried and left  
630 to grow at 25 °C until single colonies appeared. Pictures were taken and single colonies  
631 were counted blinded.

632

### 633 *Mono-association experiment of R401 on A. thaliana seedlings in Flowpots*

634 Flowpots were assembled, autoclaved, and flushed with sterile MiliQ water, as described  
635 before. R401 wild-type and the  $\Delta pvdI\Delta phlD$  double mutant were grown in 50% TSB  
636 overnight as described previously. Bacterial cells were pelleted by centrifugation, washed  
637 three times in 10 mM MgCl<sub>2</sub> and OD<sub>600</sub> was measured and adjusted. Finally, 600  $\mu$ l of  
638 OD<sub>600</sub> 1 were inoculated into 300 ml  $\frac{1}{2}$  MS medium resulting in a final bacterial  
639 concentration of OD<sub>600</sub> 0.002. Each Flowpot was flushed with 50 ml of  $\frac{1}{2}$  MS containing  
640 the bacterial inoculum. Per condition, six Flowpots were placed in a sterile microbox (Sac  
641 O2) and stored overnight. The next morning, exactly five seeds were inoculated per  
642 Flowpot and left to grow under the previously described conditions. After 21 days, roots  
643 were carefully cleaned as described above, dried and collected in pre-weighed, sterile 2 ml  
644 tubes containing 1 steel bead (3 mm diameter). Tubes were weighed again to assess the  
645 root fresh weight. Subsequently, roots were ground in a Precellys 24 TissueLyser (Bertin  
646 Technologies) for 2 x 30 s at 6,200 rpm with 15 s intervals. Then, 150  $\mu$ l of sterile 10 mM  
647 MgCl<sub>2</sub> were added to each tube and roots were ground again under the same conditions.  
648 Each sample was subsequently dilute five times 1:10 in sterile 10 mM MgCl<sub>2</sub>. Undiluted  
649 samples and each dilution were plated on 50% TSA square plates, dried and left to grow at  
650 25 °C until single colonies appeared. Pictures were taken and single colonies were counted  
651 blinded.

652

653 *DNA isolation*

654 For DNA extractions, root and soil samples were homogenized in a Precellys 24  
655 TissueLyser (Bertin Technologies) for 2 x 30 s at 6,200 rpm with 15 s intervals. DNA was  
656 extracted with a modified, high-throughput version of the FastDNA SPIN kit for Soil (MP  
657 Biomedicals). In brief, samples were taken up in sodium phosphate buffer (MP  
658 Biomedicals) and MT buffer (MP Biomedicals), then homogenized as described before.  
659 After centrifugation for 15 min at 13,000 rpm, 150 µl of the supernatant were transferred  
660 to a 96-well Acroprep Advance filter plate (with 0.2 µm Supor filter; Pall). Once full, the  
661 filter plate was positioned on a PCR plate filled with 50 µl Binding Matrix (MP  
662 Biomedicals) per well and centrifuged for 15 min to remove residual soil particles. This  
663 and all subsequent centrifugation steps were carried out in a swing out centrifuge at 1,500  
664 rpm. The PCR plate was sealed and shaken for 3 min to allow binding of the DNA to the  
665 Binding Matrix. The suspension was pipetted onto a second filter plate of the same kind,  
666 positioned on a collection plate, and centrifuged for 15 min. The flowthrough was  
667 discarded. Then, 200 µl SEWS-M washing buffer (MP Biomedicals) were pipetted into  
668 each well of the filter plate and centrifuged for 5 min. This washing step was carried out a  
669 second time. The flowthrough was discarded and followed by centrifugation for 5 min to  
670 remove residual SEWS-M buffer. Finally, 30 µl nuclease-free water were added to each  
671 well and left to incubate at room temperature for 3 min. Subsequent centrifugation for 5  
672 min eluted the DNA into a clean PCR plate. The resulting DNA was used for v5v7 16S  
673 rRNA region amplification without prior adjustment of DNA concentrations.

674

675 *Library preparation for bacterial 16S rRNA gene profiling*

676 The v5v7 variable regions of the bacterial 16S rRNA gene were amplified in 96-wells  
677 plates through PCR using 799F and 1192R primers (PCR I; **Table S4**). PCR I was  
678 performed with 0.4 µl DFS-Taq polymerase (BIORON) in 25-µl reactions containing 2.5  
679 µl 10x incomplete buffer (BIORON), 0.5 µl 10 mM MgCl<sub>2</sub>, 2.5 µl 3% BSA, 0.5 µl 10 mM  
680 dNTPs, 0.75 µl 10 µM 799F, 0.75 µl 10 µM 1192R, 1 µl of isolated DNA and adjusted to  
681 25 µl with nuclease-free water. Samples were placed in a thermocycler set at the following

682 program: 94 °C for 2 min, 25 cycles of 94 °C for 30 s, 55 °C for 30 s, 72 °C for 1 min, then  
683 a final extension at 72 °C for 10 min. Remaining primers and dNTPs were digested by  
684 Antarctic phosphatase and Exonuclease I. To each 25 µl PCR reaction, 1 µl of Antarctic  
685 phosphatase (New-England BioLabs), 1 µl of Exonuclease I (New-England BioLabs) and  
686 3 µl of Antarctic phosphatase buffer (New-England BioLabs) were added; the resulting  
687 mixture was incubated at 37 °C for 30 min followed by heat inactivation of the enzymes at  
688 85 °C for 15 min. The digested PCR I product was centrifuged at 3,000 rpm and 4 °C for  
689 10 minutes. Then, 3 µl of the supernatant were used as a template in a second PCR, using  
690 a unique combination of uniquely barcoded 799F- and 1192-based primers containing  
691 Illumina adaptors for each sample (PCR II; **Table S4**). PCR II was performed with 0.4 µl  
692 DFS-Taq polymerase in 25-µl reactions containing 2.5 µl 10x incomplete buffer, 0.5 µl 10  
693 mM MgCl<sub>2</sub>, 2.5 µl 3% BSA, 0.5 µl 10 mM dNTPs, 0.75 µl 10 µM unique forward primer,  
694 0.75 µl 10 µM unique reverse primer, 3 µl cleaned PCR I-product and adjusted to 25 µl  
695 with nuclease-free water. Samples were placed in a thermocycler set at the following  
696 program: 94 °C for 2 min, 10 cycles of 94 °C for 30 s, 55 °C for 30 s, 72 °C for 1 min, then  
697 a final extension at 72 °C for 10 min. Subsequently, 5 µl of the PCR product were combined  
698 with 1 ml Orange DNA Loading Dye, loaded on a 1% agarose gel containing 0.05% EtBr,  
699 and run at 110 mV. The expected PCR-product was an approx. 500 bp band containing the  
700 variable v5v7 regions, barcodes, and Illumina adaptors. After verification of successful  
701 amplification, samples were purified by AMPure XP (Beckman-Coulter) according to the  
702 manufacturer's protocol. The DNA concentrations of each sample were quantified using  
703 the Quant-iT dsDNA Assay-Kit (Invitrogen) and pooled per full factorial replicate in  
704 equimolar values. All pools were purified twice using AMPure XP and fluorescently  
705 quantified using the Quant-iT dsDNA Assay-Kit. All pooled samples were combined into  
706 a single pool based on equimolarity and subsequently purified three times using AMPure  
707 XP and fluorescently quantified using the Qubit dsDNA HS Assay Kit (Invitrogen). The  
708 final concentration was set to 10 ng/µl. Paired-end Illumina sequencing was performed in-  
709 house using the MiSeq sequencer and custom sequencing primers (**Table S4**).

710

711 *Analysis of 16S profiling data*

712 *ASV table generation*

713 Amplicon sequencing reads from *A. thaliana* roots and Flowpot soil were quality filtered  
714 and demultiplexed according to their barcode sequence using QIIME (26) and unique  
715 amplicon sequencing variants (ASVs) were inferred from error-corrected reads, followed  
716 by chimera filtering. ASVs were mapped to the reference 16S rRNA sequences  
717 (downloaded from “[www.at-sphere.com](http://www.at-sphere.com)”) to generate an ASV count table. All steps were  
718 carried out using the Rbec R package (27). Analysis was performed on samples with a  
719 sequencing depth of at least 500 high-quality reads.

720

721 *Alpha- and beta-diversity*

722 Analyses and visualization were performed in the R statistical environment (Version 4.1.2).  
723 Alpha and beta diversity were calculated on non-rarefied ASV count tables (28). Alpha-  
724 diversity (Shannon index) was calculated with the “plot\_richness” function in phyloseq  
725 package (29).

726 Beta-diversity (Bray-Curtis dissimilarities) was calculated using the “ordinate” function in  
727 phyloseq package and used for unconstrained ordination by Principal Coordinate Analysis  
728 (PCoA). Statistical significances were assessed using permutational multi-variate analysis  
729 of variance (PERMANOVA) using the adonis function in the vegan package (30).

730

731 *Data analysis and statistics*

732 All statistical analyses were conducted in R 4.1.2. Data visualisation was conducted using  
733 the ggplot2 package (as part of the Tidyverse) or the ggpubr package. Data normality was  
734 tested using the Shapiro-Wilk test. For normally distributed data, ANOVA and Tukey’s  
735 HSD with correction for multiple comparisons were used. As nonparametric tests, Kruskal-  
736 Wallis followed by Dunn’s post-hoc test and Benjamini-Hochberg (BH) adjustment for  
737 multiple comparisons were used. The respective statistical tests are indicated in each figure  
738 description. Significance was indicated by asterisks (\*, \*\*, and \*\*\*, indicate  $p_{adj} \leq 0.05$ ,  
739 0.01, and 0.001, respectively) or by significance group ( $p \leq 0.05$ ). No statistical methods

740 were used to pre-determine sample sizes. Phylogenetic trees were computed using Clustal  
741 Omega and subsequently visualised using iTol. Metabolomics and *16S* rRNA gene  
742 profiling data were analysed and visualized as described above. Halo size quantification in  
743 mBA experiments were performed blinded using the Fiji package of ImageJ. Colony counts  
744 of R401 were performed blinded. Figures were assembled in Adobe Illustrator.

745

## 746 **References**

747

- 748 1. Y. Bai, *et al.*, Functional overlap of the Arabidopsis leaf and root microbiota.  
749 *Nature* 2015 528:7582 **528**, 364–369 (2015).
- 750 2. A. Boucher, *et al.*, Transposon mutagenesis of *Pseudomonas solanacearum*:  
751 isolation of Tn5-induced avirulent mutants. 131--2449 (1985).
- 752 3. D. Aldon, B. Brito, C. Boucher, S. Genin, A bacterial sensor of plant cell contact  
753 controls the transcriptional induction of *Ralstonia solanacearum* pathogenicity  
754 genes. *EMBO J* **19**, 2304 (2000).
- 755 4. M. Wang, *et al.*, Sharing and community curation of mass spectrometry data with  
756 Global Natural Products Social Molecular Networking. *Nat Biotechnol* **34**, 828–  
757 837 (2016).
- 758 5. A. T. Aron, *et al.*, Reproducible molecular networking of untargeted mass  
759 spectrometry data using GNPS. *Nature Protocols* 2020 15:6 **15**, 1954–1991  
760 (2020).
- 761 6. M. J. Chaisson, G. Tesler, Mapping single molecule sequencing reads using basic  
762 local alignment with successive refinement (BLASR): Application and theory.  
763 *BMC Bioinformatics* **13**, 1–18 (2012).
- 764 7. M. Kolmogorov, J. Yuan, Y. Lin, P. A. Pevzner, Assembly of long, error-prone  
765 reads using repeat graphs. *Nat Biotechnol* **37**, 540–546 (2019).
- 766 8. T. Seemann, Prokka: rapid prokaryotic genome annotation. *Bioinformatics* **30**,  
767 2068–2069 (2014).
- 768 9. R. R. Wick, M. B. Schultz, J. Zobel, K. E. Holt, Bandage: interactive visualization  
769 of de novo genome assemblies. *Bioinformatics* **31**, 3350–3352 (2015).
- 770 10. M. Seppey, M. Manni, E. M. Zdobnov, BUSCO: Assessing genome assembly and  
771 annotation completeness. *Methods in Molecular Biology* **1962**, 227–245 (2019).



- 772 11. R. Challis, E. Richards, J. Rajan, G. Cochrane, M. Blaxter, BlobToolKit –  
773 Interactive Quality Assessment of Genome Assemblies. *G3*  
774 *Genes|Genomes|Genetics* **10**, 1361–1374 (2020).
- 775 12. K. Blin, *et al.*, antiSMASH 6.0: improving cluster detection and comparison  
776 capabilities. *Nucleic Acids Res* **49**, W29–W35 (2021).
- 777 13. D. G. Gibson, *et al.*, Enzymatic assembly of DNA molecules up to several hundred  
778 kilobases. *Nat Methods* **6**, 343–345 (2009).
- 779 14. B. H. Kvitko, A. Collmer, Construction of *Pseudomonas syringae* pv. tomato  
780 DC3000 mutant and polymutant strains. *Methods Mol Biol* **712**, 109–128 (2011).
- 781 15. D. S. Merrell, D. L. Hava, A. Camilli, Identification of novel factors involved in  
782 colonization and acid tolerance of *Vibrio cholerae*. *Mol Microbiol* **43**, 1471–1491  
783 (2002).
- 784 16. C. Leys, C. Ley, O. Klein, P. Bernard, L. Licata, Detecting outliers: Do not use  
785 standard deviation around the mean, use absolute deviation around the median. *J*  
786 *Exp Soc Psychol* **49**, 764–766 (2013).
- 787 17. S. F. Altschul, W. Gish, W. Miller, E. W. Myers, D. J. Lipman, Basic local  
788 alignment search tool. *J Mol Biol* **215**, 403–410 (1990).
- 789 18. E. Martínez-García, *et al.*, SEVA 3.0: an update of the Standard European Vector  
790 Architecture for enabling portability of genetic constructs among diverse bacterial  
791 hosts. *Nucleic Acids Res* **48**, D1164–D1170 (2020).
- 792 19. N. K. Arora, M. Verma, Modified microplate method for rapid and efficient  
793 estimation of siderophore produced by bacteria. *3 Biotech* **7** (2017).
- 794 20. B. Schwyn, J. B. Neilands, Universal chemical assay for the detection and  
795 determination of siderophores. *Anal Biochem* **160**, 47–56 (1987).
- 796 21. E. Baudoin, E. Benizri, A. Guckert, Impact of artificial root exudates on the  
797 bacterial community structure in bulk soil and maize rhizosphere. *Soil Biol*  
798 *Biochem* **35**, 1183–1192 (2003).
- 799 22. T. Thiergart, *et al.*, Root microbiota assembly and adaptive differentiation among  
800 European *Arabidopsis* populations. *Nat Ecol Evol* **4**, 122–131 (2020).

- 801 23. K. Wippel, *et al.*, Host preference and invasiveness of commensal bacteria in the  
802 Lotus and Arabidopsis root microbiota. *Nature Microbiology* 2021 6:9 6, 1150–  
803 1162 (2021).
- 804 24. J. M. Kremer, *et al.*, Peat-based gnotobiotic plant growth systems for Arabidopsis  
805 microbiome research. *Nature Protocols* 2021 16:5 16, 2450–2470 (2021).
- 806 25. K. W. Ma, *et al.*, Coordination of microbe–host homeostasis by crosstalk with  
807 plant innate immunity. *Nature Plants* 2021 7:6 7, 814–825 (2021).
- 808 26. J. G. Caporaso, *et al.*, QIIME allows analysis of high-throughput community  
809 sequencing data. *Nat Methods* 7, 335–336 (2010).
- 810 27. P. Zhang, S. Spaepen, Y. Bai, S. Hacquard, R. Garrido-Oter, Rbec: a tool for  
811 analysis of amplicon sequencing data from synthetic microbial communities. *ISME*  
812 *Communications* 2021 1:1 1, 1–3 (2021).
- 813 28. P. J. McMurdie, S. Holmes, Waste Not, Want Not: Why Rarefying Microbiome  
814 Data Is Inadmissible. *PLoS Comput Biol* 10, e1003531 (2014).
- 815 29. P. J. McMurdie, S. Holmes, phyloseq: An R Package for Reproducible Interactive  
816 Analysis and Graphics of Microbiome Census Data. *PLoS One* 8, e61217 (2013).
- 817 30. P. Dixon, VEGAN, a package of R functions for community ecology. *Journal of*  
818 *Vegetation Science* 14, 927–930 (2003).
- 819
